# Supplementary material for: Pirtobrutinib: a new hope for patients with BTK inhibitor–refractory lymphoproliferative disorders
Source: PubMed Central journal article supplement — Blood. 2023 May 10;141(26):3137–42. doi: 10.1182/blood.2023020240 (PMC10646821; doi:10.1182/blood.2023020240), 2023-05-10
Supplement: BLOOD_BLD-2023-020240-C-mmc1.pdf [file BLOOD_BLD-2023-020240-C-mmc1.pdf]

| Characteristic                 | CLL/SLL (prior BTKi), n=276 <sup>23</sup> | MCL (prior BTKi), n=90 <sup>24</sup> | RT, n=82 <sup>25</sup>  | WM n=78 <sup>26</sup> |
|--------------------------------|-------------------------------------------|--------------------------------------|-------------------------|-----------------------|
| Median age, y (range)          | 69 (36-88)                                | 70 (46-87)                           | 67 (26-95)              | 69 (42-84)            |
| Median # prior therapies       | 3 (1-11)                                  | 3 (1-11)                             | 2(RT)/4(CLL+RT)* (0-13) | 3 (1-11)              |
| Reason prior BTKi discontinued |                                           |                                      |                         |                       |
| Progression                    | 75                                        | 82                                   | NR                      | 66                    |
| Toxicity                       | 25                                        | 18                                   | NR                      | 34                    |
| Prior therapies                |                                           |                                      |                         |                       |
| BTKi                           | 100                                       | 100                                  | 34                      | 78                    |
| CD20 mAb                       | 88                                        | 96                                   | 78                      | 92                    |
| Cytotoxic chemotherapy         | 80                                        | 88                                   | 76                      | 83                    |
| BCL2 inhibitor                 | 44                                        | 16                                   | 38                      | 6                     |
| PI3K inhibitor                 | 24                                        | 3                                    | 10                      | 5                     |
| CAR-T                          | 6                                         | 4                                    | 11                      | NR                    |
| Stem cell transplant           | 2                                         | 21                                   | 6                       | 6                     |
| Immunomodulator                | NR                                        | 21                                   | 4                       | 10                    |

Supplementary table 1. Pre-treatment patient characteristics from publicly reported data in key populations of patients. Abbreviations: CLL chronic lymphocytic leukemia; MCL, mantle cell lymphoma;

Supplementary Table 2.

| Disease                              | Phase/sponsor/Trial number     | Comparator                                               | Pirtobrutinib regimen                                                                                                                                        | Primary endpoint and study aim                                                                                                                            |
|--------------------------------------|--------------------------------|----------------------------------------------------------|--------------------------------------------------------------------------------------------------------------------------------------------------------------|-----------------------------------------------------------------------------------------------------------------------------------------------------------|
| First line CLL/SLL                   | III. LOXO/Lilly/NCTNCT04023980 | Bendamustine and rituximab                               | Pirtobrutinib monotherapy                                                                                                                                    | PFS – superiority. Establish pirtobrutinib as a 1L standard of care.                                                                                      |
| R/R CLL/SLL                          | III. LOXO/Lilly/ NCT04666038   | Investigator's choice of idelalisib + R or BR            | Pirtobrutinib monotherapy                                                                                                                                    | PFS – superiority. Broad R/R registration strategy. Similar design to ASCEND, which led to acalabrutinib registration <sup>31</sup>                       |
| R/R CLL/SLL, 80% with prior BTKi     | III. LOXO/Lilly NCTNCT04965493 | Venetoclax + rituximab as per MURANO (Seymour NEJM 2018) | Pirtobrutinib (2 years, fixed duration) + standard VR.                                                                                                       | PFS – superiority. Establish superiority of PVR to VR, especially in previously BTKi-treated patients                                                     |
| CLL/SLL, 1L and R/R                  | III. LOXO/Lilly NCT05254743    | Ibrutinib                                                | Pirtobrutinib monotherapy                                                                                                                                    | Overall response rate. Establish to covalent BTK inhibitor.                                                                                               |
| Mantle cell lymphoma R/R NCT04662255 | III. LOXO/Lilly NCT            | Investigator's choice of approved BTKi                   | Pirtobrutinib monotherapy                                                                                                                                    | PFS – superiority. Establish pirtobrutinib as agent of choice in 2L treatment of MCL                                                                      |
| CLL – 1L and R/R (NCT05317936)       | II M.D. Anderson               | N/A                                                      | Pirtobrutinib added to venetoclax for MRD eradication. MRD adapted – 2 years of combination then up to 3 years of pirtobrutinib monotherapy in MRD+ patients | U-MRD4 in blood by NGS. Evaluate whether pirtobrutinib added to venetoclax will achieve U-MRD4 in patients who remain MRD+ after 12 months of venetoclax. |
| CLL – 1L and RT (NCT05536349)        | II – MD Anderson               | N/A                                                      | Pirtobrutinib + venetoclax + obinutuzumab. Time limited – 6 cycles of obinutuzumab. 6-12 cycles of venetoclax + pirtobrutinib according to MRD response      | CLL – U-MRD. RT – ORR.                                                                                                                                    |
| CLL – 1L (NCT05677919)               | II – Mayo Clinic               | N/A                                                      | Pirtobrutinib + venetoclax – 15 cycles, fixed duration                                                                                                       | U-MRD6 by Clonoseq.                                                                                                                                       |
| MCL – R/R (NCT05529069)              | II – M.D. Anderson             | N/A                                                      | Pirtobrutinib + venetoclax                                                                                                                                   | ORR @1y                                                                                                                                                   |

Select ongoing studies evaluating pirtobrutinib in CLL and MCL. Abbreviations: BR, bendamustine and rituximab; CLL, chronic lymphocytic leukemia; MCL, mantle cell lymphoma; ORR, overall response rate; PFS, progression-free survival; RT, Richter transformation; U-MRD4 (undetectable measurable residual disease with  $10^{-4}$  sensitivity); U-MRD6, undetectable measurable residual disease with  $10^{-6}$  sensitivity;
